# Supplementary material for: Additional oxidative stress reroutes the global response of Aspergillus fumigatus to iron depletion
Source: PubMed Central journal article supplement (PMC5946477; doi:10.1186/s12864-018-4730-x), 2018-05-10
Supplement: 12864_2018_4730_MOESM1_ESM.pdf [file 12864_2018_4730_MOESM1_ESM.pdf]

**Additional file 1** Primer pairs used in the study

Afu1g06390:

5'-AAGTCCGAGCGTGAGCGTG-3' and 5'-GGTGAAAGCGAGCAGAGCG-3'

Afu1g06810:

5'-GCTATCGGTGTCGGTGGTG-3' and 5'-ACTGGGGGAGAAGGGGAAG-3'

Afu1g15960:

5'-GTGTTTATGCTCTCGGTGATGTC-3' and 5'-CGGGTTCTTCTTCTTCTTCTG-3'

Afu1g16130:

5'-TGCGGGAATGCGAGATGAG-3' and 5'-AGTGATGTGCGAAGGGAGC-3'

Afu1g17270:

5'-CAGTCAGATGCGGGTAGTTG-3' and 5'-AAGGAAAAGGAGGTAGCGATG-3'

Afu2g07680:

5'-TCTTCTGTGTGTTGGGTTTGG-3' and 5'-TTCTGGTGGAGGTAGTTGAG-3'

Afu2g17600:

5'-CTCAACGACACCAACACCAAC-3' and 5'-TGCTTCAACATCAACAGGACC-3'

Afu3g02270:

5'-TCACTGCGGCTTCTTTCC-3' and 5'-ATCTCGTTGTCACCTCTGGG-3'

Afu3g03420:

5'-CTTTTATCGTGGCTCATTGCG-3' and 5'-AACCTTCATCTTTTGCTTCGTC-3'

Afu3g08160:

5'-GGTCGTTGTTGCCATCGGTG-3' and 5'-CATCTTCAGGTTGTCGGTGCG-3'

Afu3g12270:

5'-AGTCGTCCTCGTCGTCAAC-3' and 5'-TTCAGCCCCATAAGTCCAG-3'

Afu3g12920:

5'-GTAACGGGACTCAATGGACAC-3' and 5'-CAAAAGCGATGGAACAGATG-3'

Afu3g14240:

5'-GGAACACACCACGCTCAATG-3' and 5'-CAATGCCAAAACGAATGCTG-3'

Afu4g06770:

5'-CTCCTGATGTCGGTCTCGG-3' and 5'-TAATAGCGTCCTCGGCAAGC-3'

Afu4g09110:

5'-GGCACTGGAGGAAGCAAC-3' and 5'-GCGGTAGAAGATGTCACGG-3'

Afu5g03790:

5'-TCATCAGCATCAGCAATCCC-3' and 5'-TCCACCTCAACAATCTTCATCG-3'

Afu5g03800:

5'-TTGACTGGCGGCACATTC-3' and 5'-TGGAGGGAGGCTTGGTTTC-3'

Afu5g03920:

5'-ATTCCACCACGACCAAACC-3' and 5'-CACCGATACCTCCTTCTCCAAC-3'

Afu5g10370:

5'-CGCTACTGGTGTCGGTCG-3' and 5'-GGAAGGTCAAGGTGGGGTC-3'

Afu5g11260:

5'-GAGACCACATCATCCACCG-3' and 5'-TTCAAGTTCAGACACGCCAG-3'

Afu5g11760:

5'-GGAGACAGCGGGTGATAAG-3' and 5'-GAGGGAGGGAGTTGAGTTG-3'

Afu6g03480:

5'-ATCAGCCACTTCTTCCTCAGC-3' and 5'-ACCTTGTTAGCCACCACCG-3'

Afu6g03890:

5'-CTTGTGCCCTTCGTGTG-3' and 5'-GCCAGTAGTTGACCGTGCC-3'

Afu6g04360:

5'-ATCGGCAACAAGCACAACAATGG-3' and 5'-TCCTCATCTCCTCAAAATCCTCC-  
3'

Afu6g09660:

5'-GAGGGCACCGATGATGAAG-3' and 5'-AGGCAGACCAGAATGAGCAAG-3'

Afu6g12400:

5'-GTCAGGTCCCCGTTTCCAAG-3' and 5'-GGCATCATCCAAGTCCAGGTG-3'

Afu8g00370:

5'-GATACTCTTTCCCGCTGCTG-3' and 5'-TGACGATGATGACGATGCTAC-3'

Afu8g00490:

5'-GACGCCCTGCCTATCAAG-3' and 5'-GAAAACCCAACGCTCTGC-3'

Afu8g00540:

5'-GGGCGTGTGTGTCTTCTTC-3' and 5'-CAATGGCGTATGCTTCTCTG-3'
